# Supplementary material for: Event Horizon Telescope observations of the jet launching and collimation in Centaurus A
Source: Springer Nature journal article supplement (doi:10.1038/s41550-021-01417-w), 2021-07-19
Supplement: MOESM1 [file 41550_2021_1417_MOESM1_ESM.pdf]

**Supplementary information**

---

**Event Horizon Telescope observations of  
the jet launching and collimation in  
Centaurus A**

---

In the format provided by the  
authors and unedited

## Event Horizon Telescope observations of the jet launching and collimation in Centaurus A: Supplementary Information

MICHAEL JANSSEN <sup>1,2</sup> HEINO FALCKE <sup>2</sup> MATTHIAS KADLER <sup>3</sup> EDUARDO ROS <sup>1</sup>  
 MACIEK WIELGUS <sup>4,5</sup> KAZUNORI AKIYAMA <sup>6,7,4</sup> MISLAV BALOKOVIĆ <sup>8,9</sup>  
 LINDY BLACKBURN <sup>4,5</sup> KATHERINE L. BOUMAN <sup>4,5,10</sup> ANDREW CHAEL <sup>11,12</sup>  
 CHI-KWAN CHAN <sup>13,14</sup> KOUSHIK CHATTERJEE <sup>15</sup> JORDY DAVELAAR <sup>16,17,2</sup>  
 PHILIP G. EDWARDS <sup>18</sup> CHRISTIAN M. FROMM <sup>4,5,19</sup> JOSÉ L. GÓMEZ <sup>20</sup> CIRIACO GODDI <sup>2,21</sup>  
 SARA ISSAOUN <sup>2</sup> MICHAEL D. JOHNSON <sup>4,5</sup> JUNHAN KIM <sup>13,10</sup> JUN YI KOAY <sup>22</sup>  
 THOMAS P. KRICHBAUM <sup>1</sup> JUN LIU (刘俊) <sup>1</sup> ELISABETTA LIUZZO <sup>23</sup> SERA MARKOFF <sup>15,24</sup>  
 ALEX MARKOWITZ <sup>25</sup> DANIEL P. MARRONE <sup>13</sup> YOSUKE MIZUNO <sup>26,19</sup> CORNELIA MÜLLER <sup>1,2</sup>  
 CHUNCHONG NI <sup>27,28</sup> DOMINIC W. PESCE <sup>4,5</sup> VENKATESH RAMAKRISHNAN <sup>29</sup>  
 FREEK ROELOFS <sup>5,2</sup> KAZI L. J. RYGL <sup>23</sup> ILSE VAN BEMMEL <sup>30</sup> ANTXON ALBERDI <sup>20</sup>  
 WALTER ALEF <sup>1</sup> JUAN CARLOS ALGABA <sup>31</sup> RICHARD ANANTUA <sup>4,5,17</sup> KEIICHI ASADA <sup>22</sup>  
 REBECCA AZULAY <sup>32,33,1</sup> ANNE-KATHRIN BACZKO <sup>1</sup> DAVID BALL <sup>13</sup> JOHN BARRETT <sup>6</sup>  
 BRADFORD A. BENSON <sup>34,35</sup> DAN BINTLEY <sup>36</sup> RAYMOND BLUNDELL <sup>5</sup> WILFRED BOLAND <sup>37</sup>  
 GEOFFREY C. BOWER <sup>38</sup> HOPE BOYCE <sup>39,40</sup> MICHAEL BREMER <sup>41</sup>  
 CHRISTIAAN D. BRINKERINK <sup>2</sup> ROGER BRISSENDEN <sup>4,5</sup> SILKE BRITZEN <sup>1</sup>  
 AVERY E. BRODERICK <sup>42,27,28</sup> DOMINIQUE BROGUIERE <sup>41</sup> THOMAS BRONZWAER <sup>2</sup>  
 DO-YOUNG BYUN <sup>43,44</sup> JOHN E. CARLSTROM <sup>45,35,46,47</sup> SHAMI CHATTERJEE <sup>48</sup>  
 MING-TANG CHEN <sup>38</sup> YONGJUN CHEN (陈永军) <sup>49,50</sup> PAUL M. CHESLER <sup>4</sup> ILJE CHO <sup>43,44</sup>  
 PIERRE CHRISTIAN <sup>51</sup> JOHN E. CONWAY <sup>52</sup> JAMES M. CORDES <sup>53</sup> THOMAS M. CRAWFORD <sup>35,45</sup>  
 GEOFFREY B. CREW <sup>6</sup> ALEJANDRO CRUZ-OSORIO <sup>19</sup> YUZHU CUI <sup>54,55</sup>  
 MARIAFELICIA DE LAURENTIS <sup>56,19,57</sup> ROGER DEANE <sup>58,59,60</sup> JESSICA DEMPSEY <sup>36</sup>  
 GREGORY DESVIGNES <sup>61</sup> JASON DEXTER <sup>62</sup> SHEPERD S. DOELEMEN <sup>4,5</sup>  
 RALPH P. EATOUGH <sup>63,1</sup> JOSEPH FARAH <sup>5,4,64</sup> VINCENT L. FISH <sup>6</sup> ED FOMALONT <sup>65</sup>  
 H. ALYSON FORD <sup>66</sup> RAQUEL FRAGA-ENCINAS <sup>2</sup> PER FRIBERG <sup>36</sup> ANTONIO FUENTES <sup>20</sup>  
 PETER GALISON <sup>4,67,68</sup> CHARLES F. GAMMIE <sup>69,70</sup> ROBERTO GARCÍA <sup>41</sup> ZACHARY GELLES <sup>5,4</sup>  
 OLIVIER GENTAZ <sup>41</sup> BORIS GEORGIEV <sup>27,28</sup> ROMAN GOLD <sup>71,42</sup> ARTURO I. GÓMEZ-RUIZ <sup>72,73</sup>  
 MINFENG GU (顾敏峰) <sup>49,74</sup> MARK GURWELL <sup>5</sup> KAZUHIRO HADA <sup>54,55</sup>  
 DARYL HAGGARD <sup>39,40</sup> MICHAEL H. HECHT <sup>6</sup> RONALD HESPER <sup>75</sup> ELIZABETH HIMWICH <sup>76,4</sup>  
 LUIS C. HO (何子山) <sup>77,78</sup> PAUL HO <sup>22</sup> MAREKI HONMA <sup>54,55,79</sup> CHIH-WEI L. HUANG <sup>22</sup>  
 LEI HUANG (黄磊) <sup>49,74</sup> DAVID H. HUGHES <sup>72</sup> SHIRO IKEDA <sup>7,80,81,82</sup> MAKOTO INOUE <sup>22</sup>  
 DAVID J. JAMES <sup>4,5</sup> BUELL T. JANNUZI <sup>13</sup> BRITTON JETER <sup>27,28</sup> WU JIANG (江悟) <sup>49</sup>  
 ALEJANDRA JIMENEZ-ROSALES <sup>2</sup> SVETLANA JORSTAD <sup>83,84</sup> TAEHYUN JUNG <sup>43,44</sup>  
 MANSOUR KARAMI <sup>42,27</sup> RAMESH KARUPPUSAMY <sup>1</sup> TOMOHISA KAWASHIMA <sup>85</sup>  
 GARRETT K. KEATING <sup>5</sup> MARK KETTENIS <sup>30</sup> DONG-JIN KIM <sup>1</sup> JAE-YOUNG KIM <sup>43,1</sup>  
 JONGSOO KIM <sup>43</sup> MOTOKI KINO <sup>7,86</sup> YUTARO KOFUJI <sup>54,79</sup> SHOKO KOYAMA <sup>22</sup>  
 MICHAEL KRAMER <sup>1</sup> CARSTEN KRAMER <sup>41</sup> CHENG-YU KUO <sup>87,22</sup> TOD R. LAUER <sup>88</sup>  
 SANG-SUNG LEE <sup>43</sup> AVIAD LEVIS <sup>10</sup> YAN-RONG LI (李彦荣) <sup>89</sup> ZHIYUAN LI (李志远) <sup>90,91</sup>  
 MICHAEL LINDQVIST <sup>52</sup> ROCCO LICO <sup>20,1</sup> GREG LINDAHL <sup>5</sup> KUO LIU <sup>1</sup> WEN-PING LO <sup>22,92</sup>  
 ANDREI P. LOBANOV <sup>1</sup> LAURENT LOINARD <sup>93,94</sup> COLIN LONSDALE <sup>6</sup> RU-SEN LU (路如森) <sup>49,50,1</sup>  
 NICHOLAS R. MACDONALD <sup>1</sup> JIRONG MAO (毛基荣) <sup>95,96,97</sup> NICOLA MARCHILI <sup>23,1</sup>  
 ALAN P. MARSCHER <sup>83</sup> IVÁN MARTÍ-VIDAL <sup>32,33</sup> SATOKI MATSUSHITA <sup>22</sup>

LYNN D. MATTHEWS <sup>6</sup> LIA MEDEIROS <sup>98, 13</sup> KARL M. MENTEN <sup>1</sup> IZUMI MIZUNO <sup>36</sup>  
 JAMES M. MORAN <sup>4, 5</sup> KOTARO MORIYAMA <sup>6, 54</sup> MONIKA MOSCIBRODZKA <sup>2</sup>  
 GIBWA MUSOKE <sup>15, 2</sup> ALEJANDRO MUS MEJÍAS <sup>32, 33</sup> HIROSHI NAGAI <sup>7, 55</sup> NEIL M. NAGAR <sup>29</sup>  
 MASANORI NAKAMURA <sup>99, 22</sup> RAMESH NARAYAN <sup>4, 5</sup> GOPAL NARAYANAN,<sup>100</sup>  
 INIYAN NATARAJAN <sup>60, 58, 101</sup> ANTONIOS NATHANAIL,<sup>19, 102</sup> JOEY NEILSEN <sup>103</sup> ROBERTO NERI,<sup>41</sup>  
 ARISTEIDIS NOUTSOS <sup>1</sup> MICHAEL A. NOWAK <sup>104</sup> HIROKI OKINO,<sup>54, 79</sup> HÉCTOR OLIVARES <sup>2</sup>  
 GISELA N. ORTIZ-LEÓN <sup>1</sup> TOMOAKI OYAMA,<sup>54</sup> FERYAL ÖZEL,<sup>13</sup> DANIEL C. M. PALUMBO <sup>4, 5</sup>  
 JONGHO PARK <sup>22, 105</sup> NIMESH PATEL,<sup>5</sup> UE-LI PEN <sup>42, 106, 107, 108</sup> VINCENT PIÉTU,<sup>41</sup>  
 RICHARD PLAMBECK,<sup>109</sup> ALEKSANDAR POPSTEFANIJA,<sup>100</sup> OLIVER PORTH <sup>15, 19</sup> FELIX M. PÖTZL <sup>1</sup>  
 BEN PRATHER <sup>69</sup> JORGE A. PRECIADO-LÓPEZ <sup>42</sup> DIMITRIOS PSALTIS,<sup>13</sup> HUNG-YI PU <sup>110, 22, 42</sup>  
 RAMPRASAD RAO <sup>38</sup> MARK G. RAWLINGS,<sup>36</sup> ALEXANDER W. RAYMOND <sup>4, 5</sup>  
 LUCIANO REZZOLLA <sup>19, 111, 112</sup> ANGELO RICARTE <sup>4, 5</sup> BART RIPPERDA <sup>113, 17</sup> ALAN ROGERS,<sup>6</sup>  
 MEL ROSE <sup>13</sup> ARASH ROSHANINESHAT,<sup>13</sup> HELGE ROTTMANN,<sup>1</sup> ALAN L. ROY <sup>1</sup>  
 CHET RUSZCZYK <sup>6</sup> SALVADOR SÁNCHEZ,<sup>114</sup> DAVID SÁNCHEZ-ARGUELLES <sup>72, 73</sup>  
 MAHITO SASADA <sup>54, 115</sup> TUOMAS SAVOLAINEN <sup>116, 117, 1</sup> F. PETER SCHLOERB,<sup>100</sup>  
 KARL-FRIEDRICH SCHUSTER,<sup>41</sup> LIJING SHAO <sup>1, 78</sup> ZHIQIANG SHEN (沈志强) <sup>49, 50</sup> DES SMALL <sup>30</sup>  
 BONG WON SOHN <sup>43, 44, 118</sup> JASON SOOHOO <sup>6</sup> HE SUN (孙赫) <sup>10</sup> FUMIE TAZAKI <sup>54</sup>  
 ALEXANDRA J. TETARENKO <sup>119</sup> PAUL TIEDE <sup>27, 28</sup> REMO P. J. TILANUS <sup>2, 21, 120, 13</sup>  
 MICHAEL TITUS <sup>6</sup> PABLO TORNE <sup>1, 114</sup> TYLER TRENT,<sup>13</sup> EFTHALIA TRAIANOU <sup>1</sup>  
 SASCHA TRIPPE <sup>121</sup> HUIB JAN VAN LANGEVELDE <sup>30, 122</sup> DANIEL R. VAN ROSSUM <sup>2</sup>  
 JAN WAGNER,<sup>1</sup> DEREK WARD-THOMPSON <sup>123</sup> JOHN WARDLE <sup>124</sup> JONATHAN WEINTROUB <sup>4, 5</sup>  
 NORBERT WEX <sup>1</sup> ROBERT WHARTON <sup>1</sup> GEORGE N. WONG <sup>69</sup> QINGWEN WU (吴庆文) <sup>125</sup>  
 DOOSOO YOON <sup>15</sup> ANDRÉ YOUNG <sup>2</sup> KEN YOUNG <sup>5</sup> ZIRI YOUNSI <sup>126, 19, 127</sup>  
 FENG YUAN (袁峰) <sup>49, 74, 128</sup> YE-FEI YUAN (袁业飞) <sup>129</sup> J. ANTON ZENSUS <sup>1</sup>  
 GUANG-YAO ZHAO <sup>20</sup> AND SHAN-SHAN ZHAO <sup>49</sup>

<sup>1</sup>Max-Planck-Institut für Radioastronomie, Auf dem Hügel 69, D-53121 Bonn, Germany

<sup>2</sup>Department of Astrophysics, Institute for Mathematics, Astrophysics and Particle Physics (IMAPP), Radboud University, P.O. Box 9010, 6500 GL Nijmegen, The Netherlands

<sup>3</sup>Lehrstuhl für Astronomie, Universität Würzburg, Emil-Fischer Str. 31, 97074 Würzburg, Germany

<sup>4</sup>Black Hole Initiative at Harvard University, 20 Garden Street, Cambridge, MA 02138, USA

<sup>5</sup>Center for Astrophysics — Harvard & Smithsonian, 60 Garden Street, Cambridge, MA 02138, USA

<sup>6</sup>Massachusetts Institute of Technology Haystack Observatory, 99 Millstone Road, Westford, MA 01886, USA

<sup>7</sup>National Astronomical Observatory of Japan, 2-21-1 Osawa, Mitaka, Tokyo 181-8588, Japan

<sup>8</sup>Yale Center for Astronomy & Astrophysics, 52 Hillhouse Avenue, New Haven, CT 06511, USA

<sup>9</sup>Department of Physics, Yale University, P.O. Box 2018120, New Haven, CT 06520, USA

<sup>10</sup>California Institute of Technology, 1200 East California Boulevard, Pasadena, CA 91125, USA

<sup>11</sup>Princeton Center for Theoretical Science, Jadwin Hall, Princeton University, Princeton, NJ 08544, USA

<sup>12</sup>NASA Hubble Fellowship Program, Einstein Fellow

<sup>13</sup>Steward Observatory and Department of Astronomy, University of Arizona, 933 N. Cherry Ave., Tucson, AZ 85721, USA

<sup>14</sup>Data Science Institute, University of Arizona, 1230 N. Cherry Ave., Tucson, AZ 85721, USA

<sup>15</sup>Anton Pannekoek Institute for Astronomy, University of Amsterdam, Science Park 904, 1098 XH, Amsterdam, The Netherlands

<sup>16</sup>Department of Astronomy and Columbia Astrophysics Laboratory, Columbia University, 550 W 120th Street, New York, NY 10027, USA

<sup>17</sup>Center for Computational Astrophysics, Flatiron Institute, 162 Fifth Avenue, New York, NY 10010, USA

<sup>18</sup>Australia Telescope National Facility, CSIRO Astronomy and Space Science, Epping, NSW 1710, Australia

<sup>19</sup>Institut für Theoretische Physik, Goethe-Universität Frankfurt, Max-von-Laue-Straße 1, D-60438 Frankfurt am Main, Germany

- <sup>20</sup>*Instituto de Astrofísica de Andalucía-CSIC, Glorieta de la Astronomía s/n, E-18008 Granada, Spain*
- <sup>21</sup>*Leiden Observatory—Allegro, Leiden University, P.O. Box 9513, 2300 RA Leiden, The Netherlands*
- <sup>22</sup>*Institute of Astronomy and Astrophysics, Academia Sinica, 11F of Astronomy-Mathematics Building, AS/NTU No. 1, Sec. 4, Roosevelt Rd, Taipei 10617, Taiwan, R.O.C.*
- <sup>23</sup>*Italian ALMA Regional Centre, INAF-Istituto di Radioastronomia, Via P. Gobetti 101, I-40129 Bologna, Italy*
- <sup>24</sup>*Gravitation Astroparticle Physics Amsterdam (GRAPPA) Institute, University of Amsterdam, Science Park 904, 1098 XH Amsterdam, The Netherlands*
- <sup>25</sup>*Nicolaus Copernicus Astronomical Center, Polish Academy of Sciences, Bartycka 18, PL-00-716 Warszawa, Poland*
- <sup>26</sup>*Tsung-Dao Lee Institute and School of Physics and Astronomy, Shanghai Jiao Tong University, Shanghai, 200240, People's Republic of China*
- <sup>27</sup>*Department of Physics and Astronomy, University of Waterloo, 200 University Avenue West, Waterloo, ON, N2L 3G1, Canada*
- <sup>28</sup>*Waterloo Centre for Astrophysics, University of Waterloo, Waterloo, ON, N2L 3G1, Canada*
- <sup>29</sup>*Astronomy Department, Universidad de Concepción, Casilla 160-C, Concepción, Chile*
- <sup>30</sup>*Joint Institute for VLBI ERIC (JIVE), Oude Hoogeveensedijk 4, 7991 PD Dwingeloo, The Netherlands*
- <sup>31</sup>*Department of Physics, Faculty of Science, University of Malaya, 50603 Kuala Lumpur, Malaysia*
- <sup>32</sup>*Departament d'Astronomia i Astrofísica, Universitat de València, C. Dr. Moliner 50, E-46100 Burjassot, València, Spain*
- <sup>33</sup>*Observatori Astronòmic, Universitat de València, C. Catedrático José Beltrán 2, E-46980 Paterna, València, Spain*
- <sup>34</sup>*Fermi National Accelerator Laboratory, MS209, P.O. Box 500, Batavia, IL, 60510, USA*
- <sup>35</sup>*Department of Astronomy and Astrophysics, University of Chicago, 5640 South Ellis Avenue, Chicago, IL, 60637, USA*
- <sup>36</sup>*East Asian Observatory, 660 N. A'ohoku Place, Hilo, HI 96720, USA*
- <sup>37</sup>*Nederlandse Onderzoekschool voor Astronomie (NOVA), PO Box 9513, 2300 RA Leiden, The Netherlands*
- <sup>38</sup>*Institute of Astronomy and Astrophysics, Academia Sinica, 645 N. A'ohoku Place, Hilo, HI 96720, USA*
- <sup>39</sup>*Department of Physics, McGill University, 3600 rue University, Montréal, QC H3A 2T8, Canada*
- <sup>40</sup>*McGill Space Institute, McGill University, 3550 rue University, Montréal, QC H3A 2A7, Canada*
- <sup>41</sup>*Institut de Radioastronomie Millimétrique, 300 rue de la Piscine, F-38406 Saint Martin d'Hères, France*
- <sup>42</sup>*Perimeter Institute for Theoretical Physics, 31 Caroline Street North, Waterloo, ON, N2L 2Y5, Canada*
- <sup>43</sup>*Korea Astronomy and Space Science Institute, Daedeok-daero 776, Yuseong-gu, Daejeon 34055, Republic of Korea*
- <sup>44</sup>*University of Science and Technology, Gajeong-ro 217, Yuseong-gu, Daejeon 34113, Republic of Korea*
- <sup>45</sup>*Kavli Institute for Cosmological Physics, University of Chicago, 5640 South Ellis Avenue, Chicago, IL, 60637, USA*
- <sup>46</sup>*Department of Physics, University of Chicago, 5720 South Ellis Avenue, Chicago, IL 60637, USA*
- <sup>47</sup>*Enrico Fermi Institute, University of Chicago, 5640 South Ellis Avenue, Chicago, IL 60637, USA*
- <sup>48</sup>*Cornell Center for Astrophysics and Planetary Science, Cornell University, Ithaca, NY 14853, USA*
- <sup>49</sup>*Shanghai Astronomical Observatory, Chinese Academy of Sciences, 80 Nandan Road, Shanghai 200030, People's Republic of China*
- <sup>50</sup>*Key Laboratory of Radio Astronomy, Chinese Academy of Sciences, Nanjing 210008, People's Republic of China*
- <sup>51</sup>*Physics Department, Fairfield University, 1073 North Benson Road, Fairfield, CT 06824, USA*
- <sup>52</sup>*Department of Space, Earth and Environment, Chalmers University of Technology, Onsala Space Observatory, SE-43992 Onsala, Sweden*
- <sup>53</sup>*Cornell Center for Astrophysics and Planetary Science, Cornell University, Ithaca, NY 14853, USA*
- <sup>54</sup>*Mizusawa VLBI Observatory, National Astronomical Observatory of Japan, 2-12 Hoshigaoka, Mizusawa, Oshu, Iwate 023-0861, Japan*
- <sup>55</sup>*Department of Astronomical Science, The Graduate University for Advanced Studies (SOKENDAI), 2-21-1 Osawa, Mitaka, Tokyo 181-8588, Japan*
- <sup>56</sup>*Dipartimento di Fisica "E. Pancini", Università di Napoli "Federico II", Compl. Univ. di Monte S. Angelo, Edificio G, Via Cinthia, I-80126, Napoli, Italy*

- <sup>57</sup> *INFN Sez. di Napoli, Compl. Univ. di Monte S. Angelo, Edificio G, Via Cinthia, I-80126, Napoli, Italy*
- <sup>58</sup> *Wits Centre for Astrophysics, University of the Witwatersrand, 1 Jan Smuts Avenue, Braamfontein, Johannesburg 2050, South Africa*
- <sup>59</sup> *Department of Physics, University of Pretoria, Hatfield, Pretoria 0028, South Africa*
- <sup>60</sup> *Centre for Radio Astronomy Techniques and Technologies, Department of Physics and Electronics, Rhodes University, Makhanda 6140, South Africa*
- <sup>61</sup> *LESIA, Observatoire de Paris, Université PSL, CNRS, Sorbonne Université, Université de Paris, 5 place Jules Janssen, 92195 Meudon, France*
- <sup>62</sup> *JILA and Department of Astrophysical and Planetary Sciences, University of Colorado, Boulder, CO 80309, USA*
- <sup>63</sup> *National Astronomical Observatories, Chinese Academy of Sciences, 20A Datun Road, Chaoyang District, Beijing 100101, PR China*
- <sup>64</sup> *University of Massachusetts Boston, 100 William T. Morrissey Boulevard, Boston, MA 02125, USA*
- <sup>65</sup> *National Radio Astronomy Observatory, 520 Edgemont Rd, Charlottesville, VA 22903, USA*
- <sup>66</sup> *Steward Observatory and Department of Astronomy, University of Arizona, 933 N. Cherry Avenue, Tucson, AZ 85721, USA*
- <sup>67</sup> *Department of History of Science, Harvard University, Cambridge, MA 02138, USA*
- <sup>68</sup> *Department of Physics, Harvard University, Cambridge, MA 02138, USA*
- <sup>69</sup> *Department of Physics, University of Illinois, 1110 West Green Street, Urbana, IL 61801, USA*
- <sup>70</sup> *Department of Astronomy, University of Illinois at Urbana-Champaign, 1002 West Green Street, Urbana, IL 61801, USA*
- <sup>71</sup> *CP3-Origins, University of Southern Denmark, Campusvej 55, DK-5230 Odense M, Denmark*
- <sup>72</sup> *Instituto Nacional de Astrofísica, Óptica y Electrónica. Apartado Postal 51 y 216, 72000. Puebla Pue., México*
- <sup>73</sup> *Consejo Nacional de Ciencia y Tecnología, Av. Insurgentes Sur 1582, 03940, Ciudad de México, México*
- <sup>74</sup> *Key Laboratory for Research in Galaxies and Cosmology, Chinese Academy of Sciences, Shanghai 200030, People's Republic of China*
- <sup>75</sup> *NOVA Sub-mm Instrumentation Group, Kapteyn Astronomical Institute, University of Groningen, Landleven 12, 9747 AD Groningen, The Netherlands*
- <sup>76</sup> *Center for the Fundamental Laws of Nature, Harvard University, Cambridge, MA 02138, USA*
- <sup>77</sup> *Department of Astronomy, School of Physics, Peking University, Beijing 100871, People's Republic of China*
- <sup>78</sup> *Kavli Institute for Astronomy and Astrophysics, Peking University, Beijing 100871, People's Republic of China*
- <sup>79</sup> *Department of Astronomy, Graduate School of Science, The University of Tokyo, 7-3-1 Hongo, Bunkyo-ku, Tokyo 113-0033, Japan*
- <sup>80</sup> *The Institute of Statistical Mathematics, 10-3 Midori-cho, Tachikawa, Tokyo, 190-8562, Japan*
- <sup>81</sup> *Department of Statistical Science, The Graduate University for Advanced Studies (SOKENDAI), 10-3 Midori-cho, Tachikawa, Tokyo 190-8562, Japan*
- <sup>82</sup> *Kavli Institute for the Physics and Mathematics of the Universe, The University of Tokyo, 5-1-5 Kashiwanoha, Kashiwa, 277-8583, Japan*
- <sup>83</sup> *Institute for Astrophysical Research, Boston University, 725 Commonwealth Ave., Boston, MA 02215, USA*
- <sup>84</sup> *Astronomical Institute, St. Petersburg University, Universitetskij pr., 28, Petrodvorets, 198504 St. Petersburg, Russia*
- <sup>85</sup> *Institute for Cosmic Ray Research, The University of Tokyo, 5-1-5 Kashiwanoha, Kashiwa, Chiba 277-8582, Japan*
- <sup>86</sup> *Kogakuin University of Technology & Engineering, Academic Support Center, 2665-1 Nakano, Hachioji, Tokyo 192-0015, Japan*
- <sup>87</sup> *Physics Department, National Sun Yat-Sen University, No. 70, Lien-Hai Rd, Kaosiung City 80424, Taiwan, R.O.C*
- <sup>88</sup> *National Optical Astronomy Observatory, 950 N. Cherry Ave., Tucson, AZ 85719, USA*
- <sup>89</sup> *Key Laboratory for Particle Astrophysics, Institute of High Energy Physics, Chinese Academy of Sciences, 19B Yuquan Road, Shijingshan District, Beijing, People's Republic of China*
- <sup>90</sup> *School of Astronomy and Space Science, Nanjing University, Nanjing 210023, People's Republic of China*

- <sup>91</sup>Key Laboratory of Modern Astronomy and Astrophysics, Nanjing University, Nanjing 210023, People's Republic of China
- <sup>92</sup>Department of Physics, National Taiwan University, No.1, Sect.4, Roosevelt Rd., Taipei 10617, Taiwan, R.O.C
- <sup>93</sup>Instituto de Radioastronomía y Astrofísica, Universidad Nacional Autónoma de México, Morelia 58089, México
- <sup>94</sup>Instituto de Astronomía, Universidad Nacional Autónoma de México, CdMx 04510, México
- <sup>95</sup>Yunnan Observatories, Chinese Academy of Sciences, 650011 Kunming, Yunnan Province, People's Republic of China
- <sup>96</sup>Center for Astronomical Mega-Science, Chinese Academy of Sciences, 20A Datun Road, Chaoyang District, Beijing, 100012, People's Republic of China
- <sup>97</sup>Key Laboratory for the Structure and Evolution of Celestial Objects, Chinese Academy of Sciences, 650011 Kunming, People's Republic of China
- <sup>98</sup>School of Natural Sciences, Institute for Advanced Study, 1 Einstein Drive, Princeton, NJ 08540, USA
- <sup>99</sup>National Institute of Technology, Hachinohe College, 16-1 Uwanotai, Tamonoki, Hachinohe City, Aomori 039-1192, Japan
- <sup>100</sup>Department of Astronomy, University of Massachusetts, 01003, Amherst, MA, USA
- <sup>101</sup>South African Radio Astronomy Observatory, Observatory 7925, Cape Town, South Africa
- <sup>102</sup>Department of Physics, National and Kapodistrian University of Athens, Panepistimiopolis, GR 15783 Zografos, Greece
- <sup>103</sup>Villanova University, Mendel Science Center Rm. 263B, 800 E Lancaster Ave, Villanova PA 19085
- <sup>104</sup>Physics Department, Washington University CB 1105, St Louis, MO 63130, USA
- <sup>105</sup>EACOA fellow
- <sup>106</sup>Canadian Institute for Theoretical Astrophysics, University of Toronto, 60 St. George Street, Toronto, ON M5S 3H8, Canada
- <sup>107</sup>Dunlap Institute for Astronomy and Astrophysics, University of Toronto, 50 St. George Street, Toronto, ON M5S 3H4, Canada
- <sup>108</sup>Canadian Institute for Advanced Research, 180 Dundas St West, Toronto, ON M5G 1Z8, Canada
- <sup>109</sup>Radio Astronomy Laboratory, University of California, Berkeley, CA 94720, USA
- <sup>110</sup>Department of Physics, National Taiwan Normal University, No. 88, Sec.4, Tingzhou Rd., Taipei 116, Taiwan, R.O.C.
- <sup>111</sup>Frankfurt Institute for Advanced Studies, Ruth-Moufang-Strasse 1, 60438 Frankfurt, Germany
- <sup>112</sup>School of Mathematics, Trinity College, Dublin 2, Ireland
- <sup>113</sup>Department of Astrophysical Sciences, Peyton Hall, Princeton University, Princeton, NJ 08544, USA
- <sup>114</sup>Instituto de Radioastronomía Milimétrica, IRAM, Avenida Divina Pastora 7, Local 20, E-18012, Granada, Spain
- <sup>115</sup>Hiroshima Astrophysical Science Center, Hiroshima University, 1-3-1 Kagamiyama, Higashi-Hiroshima, Hiroshima 739-8526, Japan
- <sup>116</sup>Aalto University Department of Electronics and Nanoengineering, PL 15500, FI-00076 Aalto, Finland
- <sup>117</sup>Aalto University Metsähovi Radio Observatory, Metsähovintie 114, FI-02540 Kylmäla, Finland
- <sup>118</sup>Department of Astronomy, Yonsei University, Yonsei-ro 50, Seodaemun-gu, 03722 Seoul, Republic of Korea
- <sup>119</sup>East Asian Observatory, 660 North A'ohoku Place, Hilo, HI 96720, USA
- <sup>120</sup>Netherlands Organisation for Scientific Research (NWO), Postbus 93138, 2509 AC Den Haag, The Netherlands
- <sup>121</sup>Department of Physics and Astronomy, Seoul National University, Gwanak-gu, Seoul 08826, Republic of Korea
- <sup>122</sup>Leiden Observatory, Leiden University, Postbus 2300, 9513 RA Leiden, The Netherlands
- <sup>123</sup>Jeremiah Horrocks Institute, University of Central Lancashire, Preston PR1 2HE, UK
- <sup>124</sup>Physics Department, Brandeis University, 415 South Street, Waltham, MA 02453, USA
- <sup>125</sup>School of Physics, Huazhong University of Science and Technology, Wuhan, Hubei, 430074, People's Republic of China
- <sup>126</sup>Mullard Space Science Laboratory, University College London, Holmbury St. Mary, Dorking, Surrey, RH5 6NT, UK

<sup>127</sup> *UKRI Stephen Hawking Fellow*

<sup>128</sup> *School of Astronomy and Space Sciences, University of Chinese Academy of Sciences, No. 19A Yuquan Road, Beijing 100049, People's Republic of China*

<sup>129</sup> *Astronomy Department, University of Science and Technology of China, Hefei 230026, People's Republic of China*

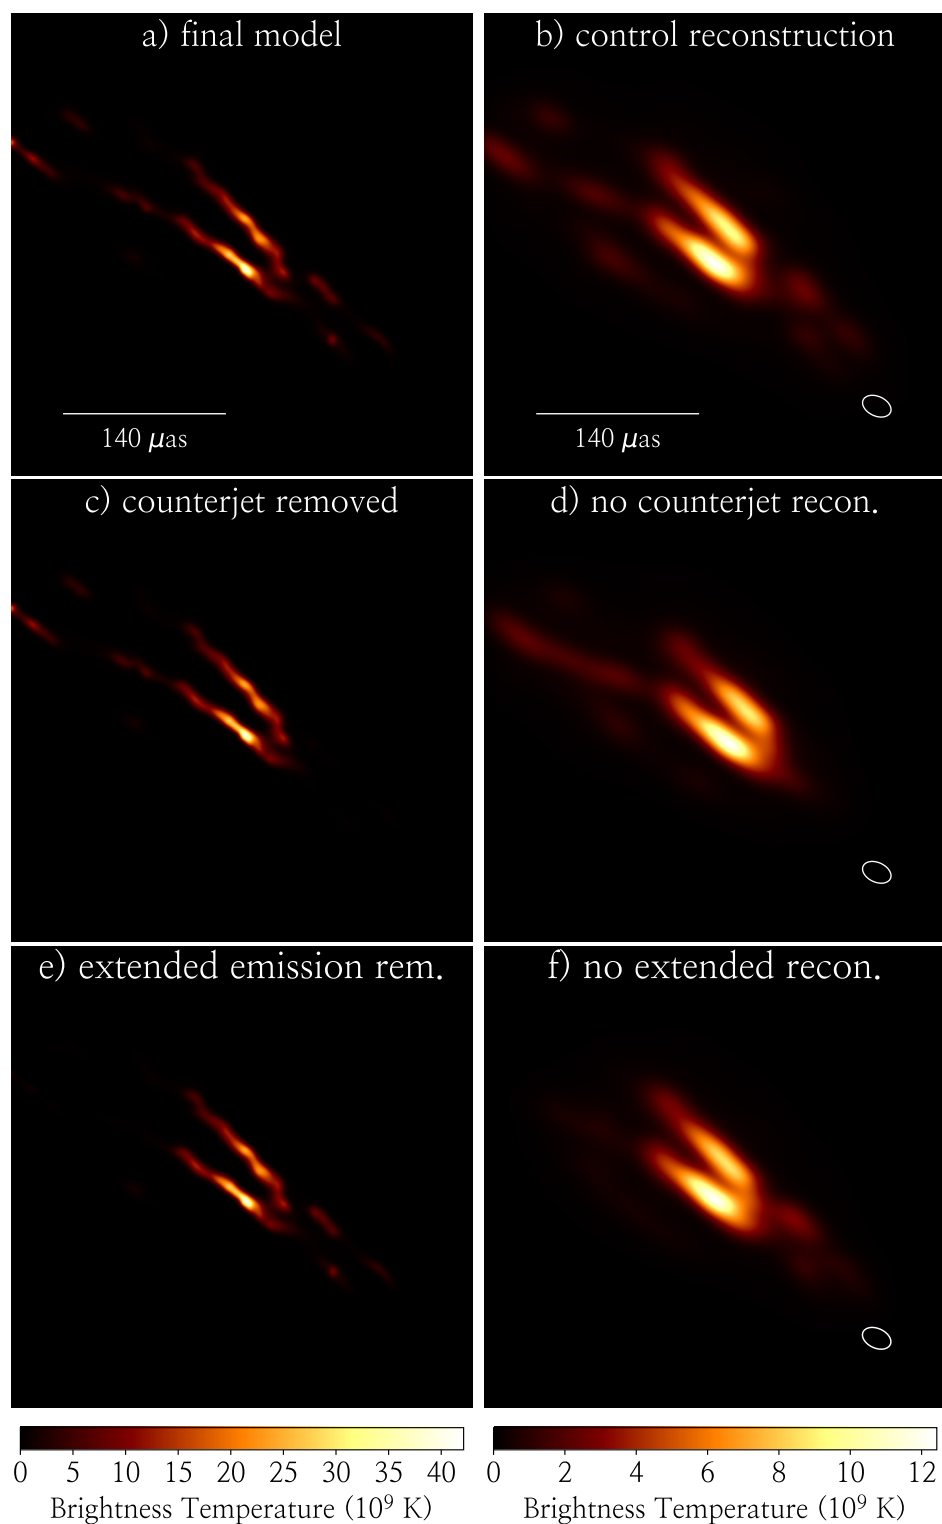

**Supplementary Figure 1: SYMBA synthetic data imaging tests.** The left panel shows the input models  $\mathcal{M}$ , which are based on our observational image reconstruction. The corresponding reconstructions  $\mathcal{I}$  from the SYMBA pipeline are displayed in the right panel. (a-b) a control study, where the final model  $\mathcal{M}_{\text{final}}$  underlying the image reconstruction  $\mathcal{I}_{\text{final}}^{(\text{obs})}$  from the observational rPI-CARD data is passed through SYMBA. (c-d and e-f) same as (a-b) but the counterjet and extended jet emission features have been removed. The SYMBA reconstructions are convolved with a restoring beam, which matches the nominal resolution of the observation (shown in the bottom right corner).



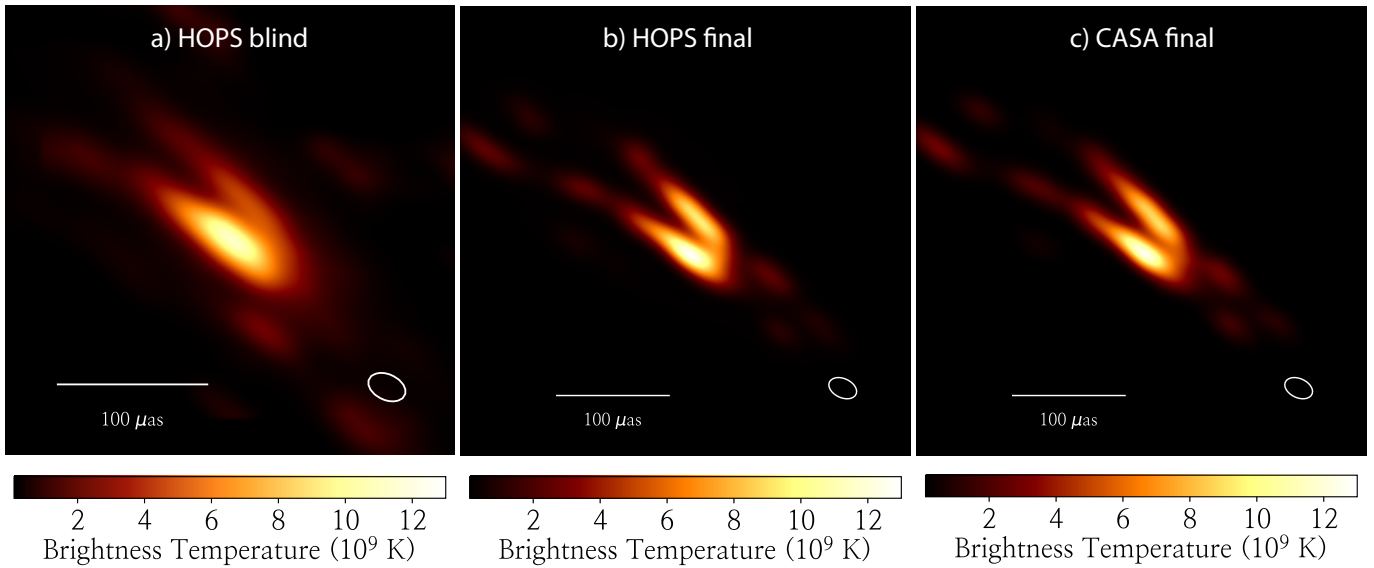

**Supplementary Figure 2: Image consistency across data sets.** Left (a): Average image of six blind reconstructions from early EHT-HOPS low band (226–228 GHz) data, which was prepared with outdated a priori calibration parameters. Middle (b) and right (c): Images from the EHT-HOPS and rPICARD data, respectively, reconstructed with the final imaging parameters (Table 1). The restoring beams are plotted in the bottom right corner.

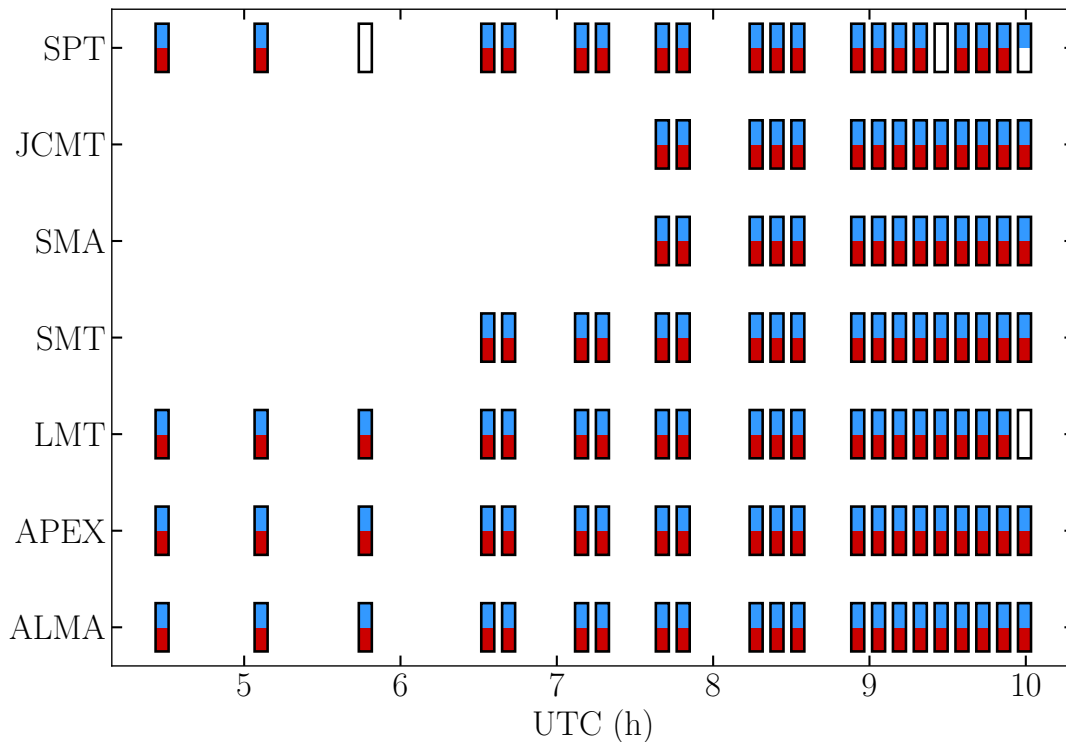

**Supplementary Figure 3: Centaurus A (Cen A) observing block.** The boxes show the planned VLBI scans in the observational VEX file. Blue (top) and red (bottom) markers in each box show detections in the EHT-HOPS and rPICARD data, respectively.

**Supplementary Table 1:** Final imaging parameters.

|                                            |                                            |                                                         |                                |
|--------------------------------------------|--------------------------------------------|---------------------------------------------------------|--------------------------------|
| LMT Gaussian self-calibration              | $\Theta_{\text{maj}}$                      | major axis of Gaussian self-calibration model           | $60 \mu\text{as}$              |
|                                            | $\Theta_{\text{min}}$                      | minor axis of Gaussian self-calibration model           | $60 \mu\text{as}$              |
|                                            | $\Theta_{\text{PA}}$                       | position angle of Gaussian self-calibration model       | $0^\circ$                      |
|                                            | $S_G$                                      | flux density of Gaussian self-calibration model         | $0.6 \text{ Jy}$               |
| Imaging priors                             | $\Phi_{\text{maj}}$                        | major axis of Gaussian image prior                      | $70 \mu\text{as}$              |
|                                            | $\Phi_{\text{min}}$                        | minor axis of Gaussian image prior                      | $18 \mu\text{as}$              |
|                                            | $\Phi_{\text{PA}}$                         | position angle of Gaussian image prior                  | $45^\circ$                     |
|                                            | $Z_0$                                      | flux density of Gaussian image prior                    | $2 \text{ Jy}$                 |
| Regularizer                                | $\beta_z$                                  | weight for $Z_0$                                        | 0.1                            |
| weights                                    | $\beta_{\text{MEM}}$                       | weight for maximum entropy minimization                 | 10                             |
| Data                                       | $\alpha_{\text{amp}}^{(1,2,3)}$            | incremental weights for measured amplitudes             | 0.2, 2, 10                     |
| weights                                    | $\alpha_{\text{cp}}^{(1,2,3)}$             | incremental weights for measured closure phases         | 1, 10, 20                      |
|                                            | $\alpha_{\text{lca}}^{(1,2,3)}$            | incremental weights for measured log closure amplitudes | 1, 10, 20                      |
| rPICARD image goodness of fit              | $\chi_{\text{amp}}^2$                      | goodness of fit for amplitudes                          | 1.0                            |
|                                            | $\chi_{\text{cp}}^2$                       | goodness of fit for closure phases                      | 1.8                            |
|                                            | $\chi_{\text{lca}}^2$                      | goodness of fit for log closure amplitudes              | 2.3                            |
|                                            | $\mathcal{A}_{\text{intra}}^{(\text{sc})}$ | mean self-calibration gain for co-located stations      | 0.98                           |
|                                            | $\mathcal{A}_{\text{LMT}}^{(\text{sc})}$   | LMT mean self-calibration gain                          | 1.13                           |
|                                            | $\mathcal{A}_{\text{SMT}}^{(\text{sc})}$   | SMT mean self-calibration gain                          | 1.01                           |
|                                            | $\mathcal{A}_{\text{SPT}}^{(\text{sc})}$   | SPT mean self-calibration gain                          | 1.03                           |
|                                            | EHT-HOPS image goodness of fit             | $\chi_{\text{amp}}^2$                                   | goodness of fit for amplitudes |
| $\chi_{\text{cp}}^2$                       |                                            | goodness of fit for closure phases                      | 2.1                            |
| $\chi_{\text{lca}}^2$                      |                                            | goodness of fit for log closure amplitudes              | 1.2                            |
| $\mathcal{A}_{\text{intra}}^{(\text{sc})}$ |                                            | mean self-calibration gain for co-located stations      | 0.98                           |
| $\mathcal{A}_{\text{LMT}}^{(\text{sc})}$   |                                            | LMT mean self-calibration gain                          | 1.15                           |
| $\mathcal{A}_{\text{SMT}}^{(\text{sc})}$   |                                            | SMT mean self-calibration gain                          | 1.01                           |
| $\mathcal{A}_{\text{SPT}}^{(\text{sc})}$   |                                            | SPT mean self-calibration gain                          | 1.00                           |

Note –  $\mathcal{A}_{\text{intra}}^{(\text{sc})}$  corresponds to the mean gain of Atacama Large Millimeter/submillimeter Array (ALMA), Atacama Pathfinder Experiment (APEX), James Clerk Maxwell Telescope (JCMT), and Submillimeter Array (SMA).

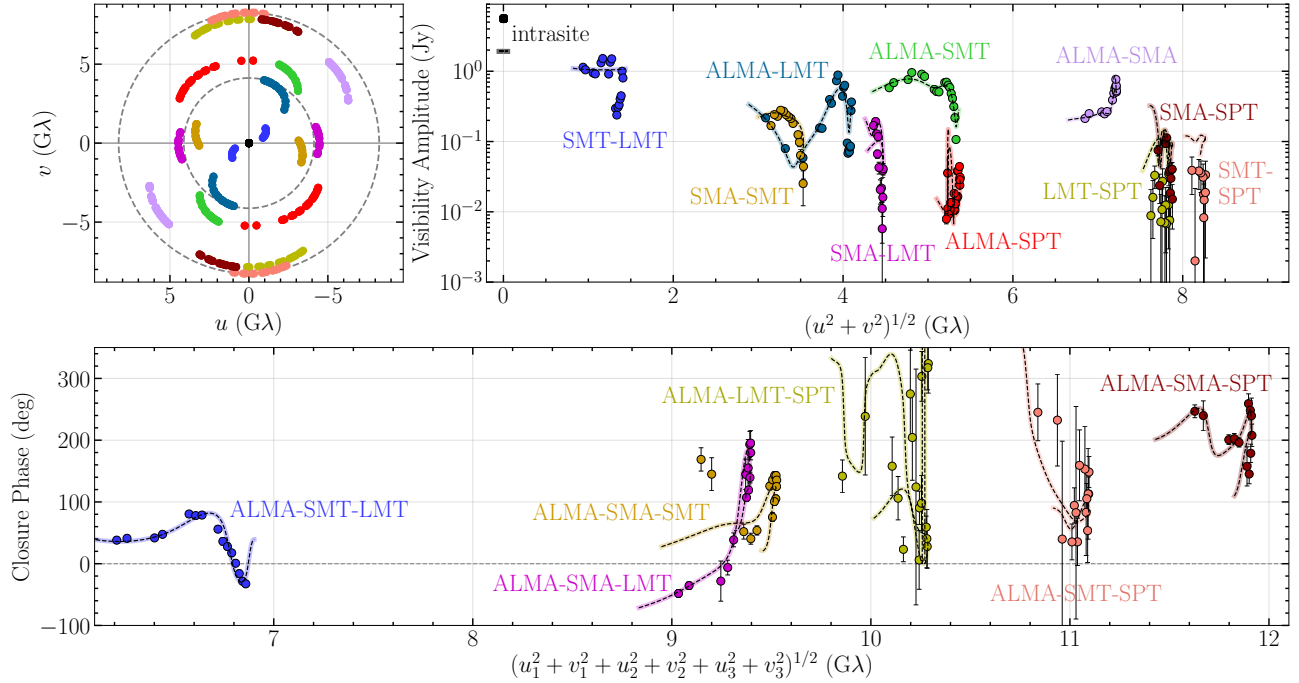

**Supplementary Figure 4: Cen A data properties from April 2017.** The top left panel shows the  $(u, v)$  coverage. A priori calibrated amplitude (before self-calibration) and closure phase data points are shown in the top right and bottom panel, respectively, overplotted with lines from the final image model as a function of  $(u, v)$  distances. The error bars indicate thermal noise and 5% non-closing error uncertainties added in quadrature, which are smaller than the plotted symbols in some cases. The color-coding shows different baselines. Amplitudes projected along and perpendicular to the jet position angle are given in Supplementary Fig. 5.

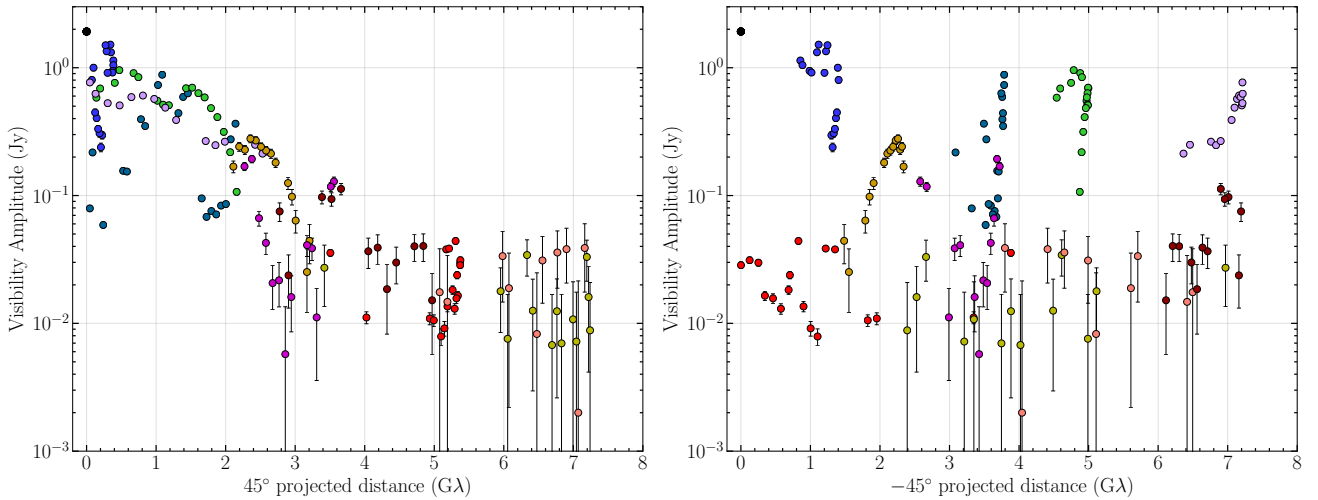

**Supplementary Figure 5: Source structure along specific position angles on the sky.** A priori calibrated amplitudes are shown projected along the jet position angle (PA) on the sky in the left panel and perpendicular to the PA in the right panel. The color coding and error bars shown are the same as in Supplementary Fig. 4.

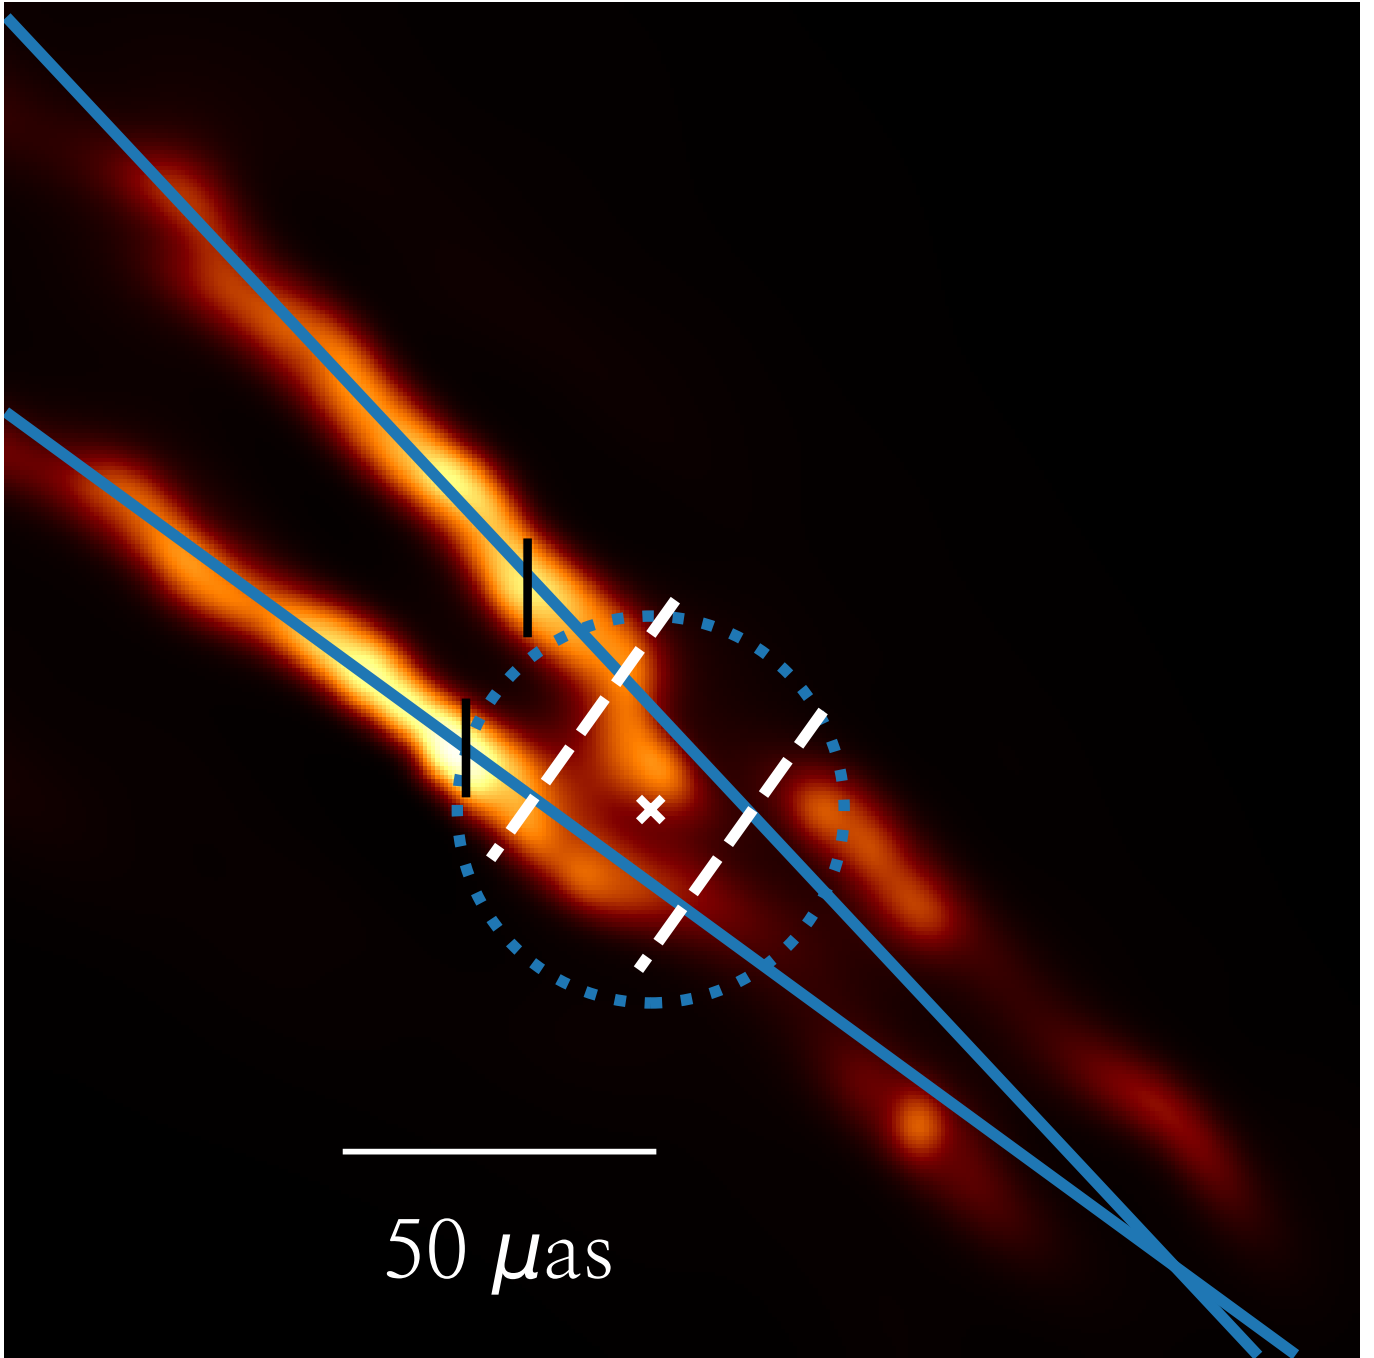

**Supplementary Figure 6: Determination of the jet apex location.** A zoomed-in version of the final image model is shown. The solid blue lines show simple linear extrapolations of the inner NW and SE jet arms, which would place the jet apex well within the counterjet region. The dashed white lines mark the certain edges of the approaching jet and the counterjet. The quadrangle enclosed by the solid and dashed lines is the region where the jet apex is located. Inside this quadrangle, a tentative convergence of the two streamlines can be seen. The apex position assumed in this work is indicated with a white cross. The surrounding blue dashed circle corresponds to the  $z_{\text{col}} = 32 \mu\text{as}$  distance. Vertical black bars mark the brightest regions along each jet arm, which correspond to the assumed location of the radio core.
